# Supplementary material
Source: PubMed Central journal article supplement (PMC4447142)

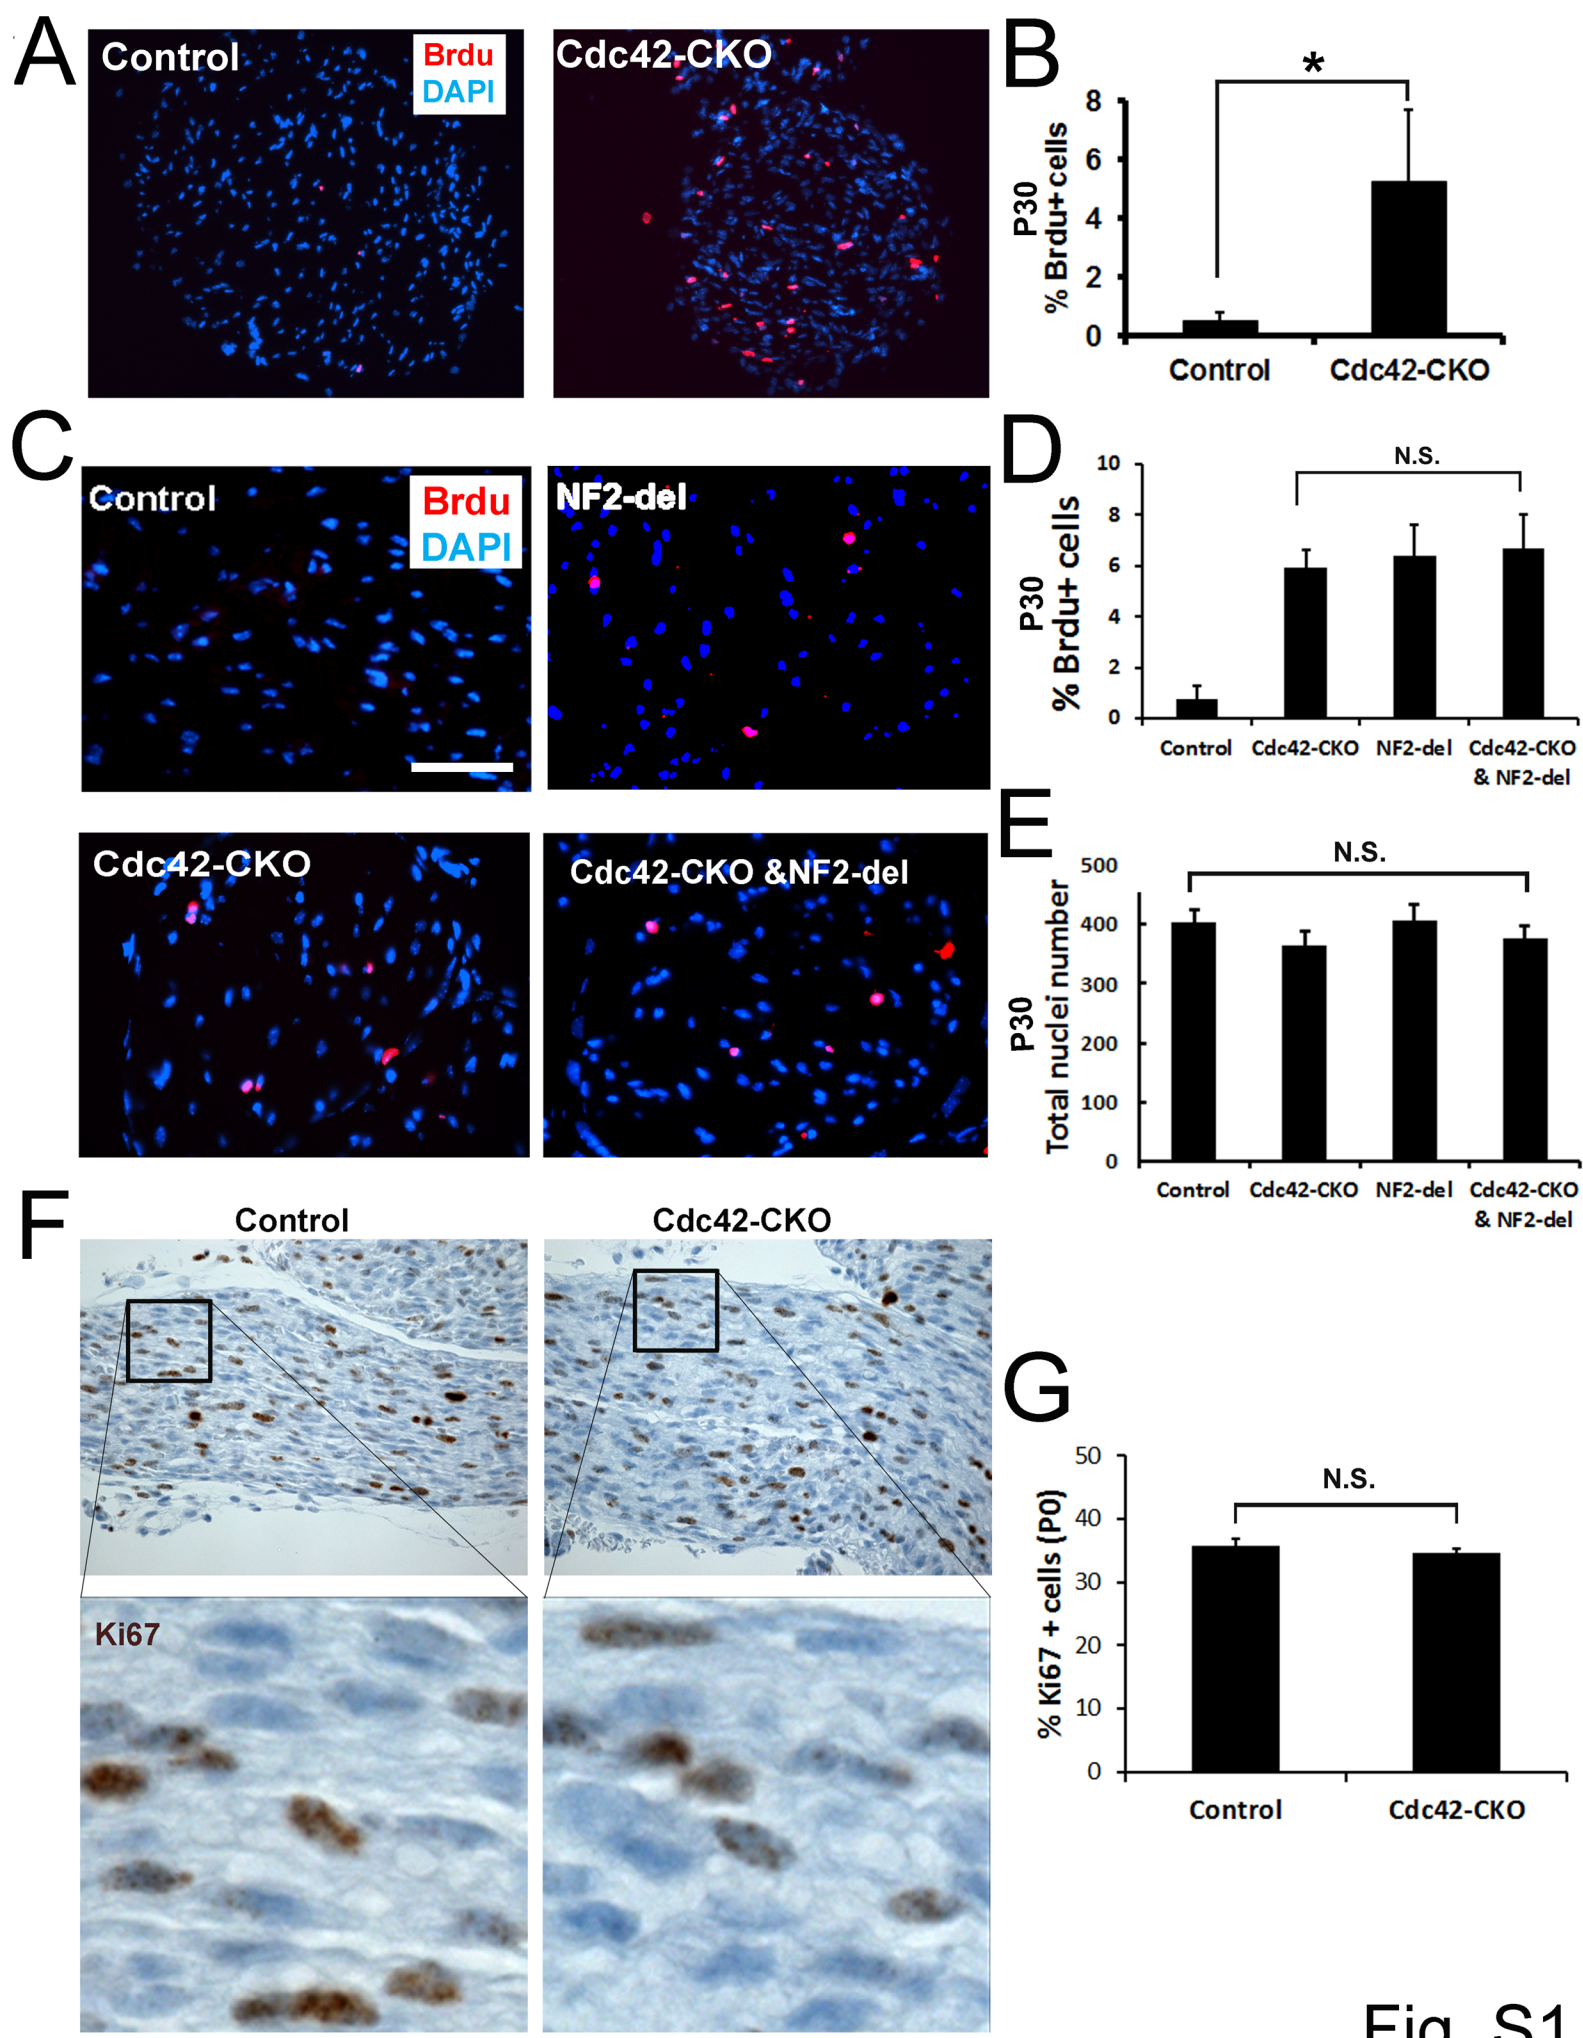

Fig. S1

Supplement: NIHMS687335-supplement-Supplemental_Figure_1.pdf [file NIHMS687335-supplement-Supplemental_Figure_1.pdf]
